# Supplementary material for: The impact of a diagnostic decision support system on the consultation: perceptions of GPs and patients
Source: Springer Nature journal article supplement (doi:10.1186/s12911-017-0477-6), 2017-06-02
Supplement: MOESM1 [file 12335520]

11. The information (such as on-line help, on-screen messages and other documentation) provided with this system was clear.

N/A    **STRONGLY**            1    2    3    4    5    6    7    **STRONGLY**  
         **DISAGREE**  
         **COMMENTS:**

12. It was easy to find the information I needed.

N/A    **STRONGLY**            1    2    3    4    5    6    7    **STRONGLY**  
         **DISAGREE**  
         **COMMENTS:**

13. The information provided for the system was easy to understand.

N/A    **STRONGLY**            1    2    3    4    5    6    7    **STRONGLY**  
         **DISAGREE**  
         **COMMENTS:**

14. The information was effective in helping me complete the tasks and scenarios.

N/A    **STRONGLY**            1    2    3    4    5    6    7    **STRONGLY**  
         **DISAGREE**  
         **COMMENTS:**

15. The organization of information on the system screens was clear.

N/A    **STRONGLY**            1    2    3    4    5    6    7    **STRONGLY**  
         **DISAGREE**  
         **COMMENTS:**

16. The interface of this system was pleasant.

*Note: The interface includes those items that you use to interact with the system. For example, some components of the interface are the keyboard, the mouse, the screens (including their use of graphics and language).*

N/A    **STRONGLY**            1    2    3    4    5    6    7    **STRONGLY**  
         **DISAGREE**  
         **COMMENTS:**

17. I liked using the interface of this system.

N/A    **STRONGLY**            1    2    3    4    5    6    7    **STRONGLY**  
         **DISAGREE**  
         **COMMENTS:**

18. This system has all the functions and capabilities I expect it to have.

N/A    **STRONGLY**            1    2    3    4    5    6    7    **STRONGLY**  
         **DISAGREE**  
         **COMMENTS:**

19. Overall, I am satisfied with this system.

N/A    **STRONGLY**            1    2    3    4    5    6    7    **STRONGLY**  
         **DISAGREE**  
         **COMMENTS:**
